# Supplementary material
Source: PubMed Central journal article supplement (PMC1458688)

A

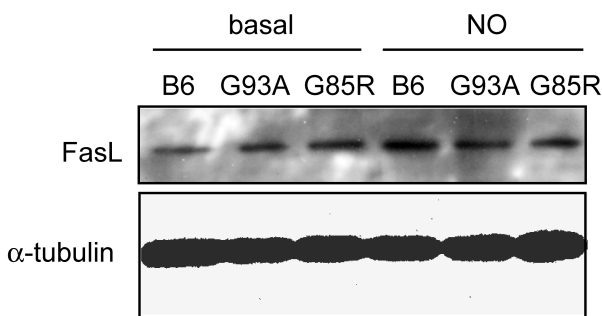

B

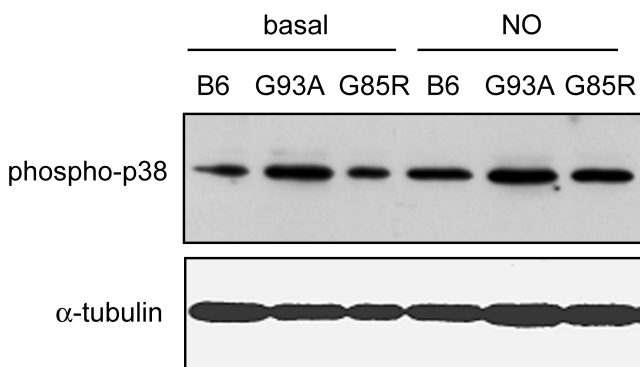

C

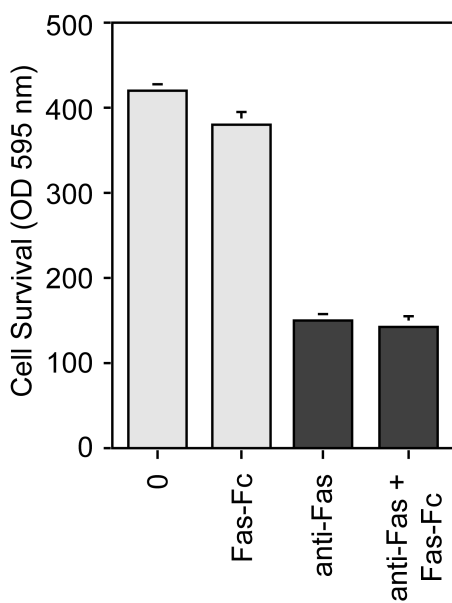

Supplement: pnas_0508774103_2.pdf [file pnas_0508774103_2.pdf]
